# Supplementary material for: Network analysis of noncoding RNAs in pepper provides insights into fruit ripening control
Source: PubMed Central journal article supplement (PMC6584694; doi:10.1038/s41598-019-45427-1), 2019-06-19

# **Network analysis of non-coding RNAs in pepper provides insights into fruit ripening control**

Jinhua Zuo<sup>1,2\*</sup>, Yunxiang Wang<sup>3</sup>, Benzhong Zhu<sup>4</sup>, Yunbo Luo<sup>4</sup>, Qing Wang<sup>1\*</sup>, Lipu Gao<sup>1\*</sup>

<sup>1</sup> Key Laboratory of Vegetable Postharvest Processing, Ministry of Agriculture, Beijing Key Laboratory of Fruits and Vegetable Storage and Processing, Key Laboratory of Biology and Genetic Improvement of Horticultural Crops (North China) of Ministry of Agriculture, Key Laboratory of Urban Agriculture (North) of Ministry of Agriculture, Beijing Vegetable Research Center, Beijing Academy of Agriculture and Forestry Sciences, Beijing 100097, China

<sup>2</sup> Boyce Thompson Institute for Plant Research, Cornell University Campus, Ithaca, NY, 14853, USA.

<sup>3</sup> Beijing Academy of Forestry and Pomology Sciences, Beijing Academy of Agriculture and Forestry Sciences, Beijing, 100093, China

<sup>4</sup> Laboratory of Postharvest Molecular Biology of Fruits and vegetables, Department of Food Biotechnology, College of Food Science and Nutritional Engineering, China Agricultural University, Beijing 100083, China

\*Corresponding author, E-mail address: zuojinhua@126.com;

### Appendix.3 The expressions of lncRNAs vs mRNAs

#### The expression of of lncRNAs vs mRNAs

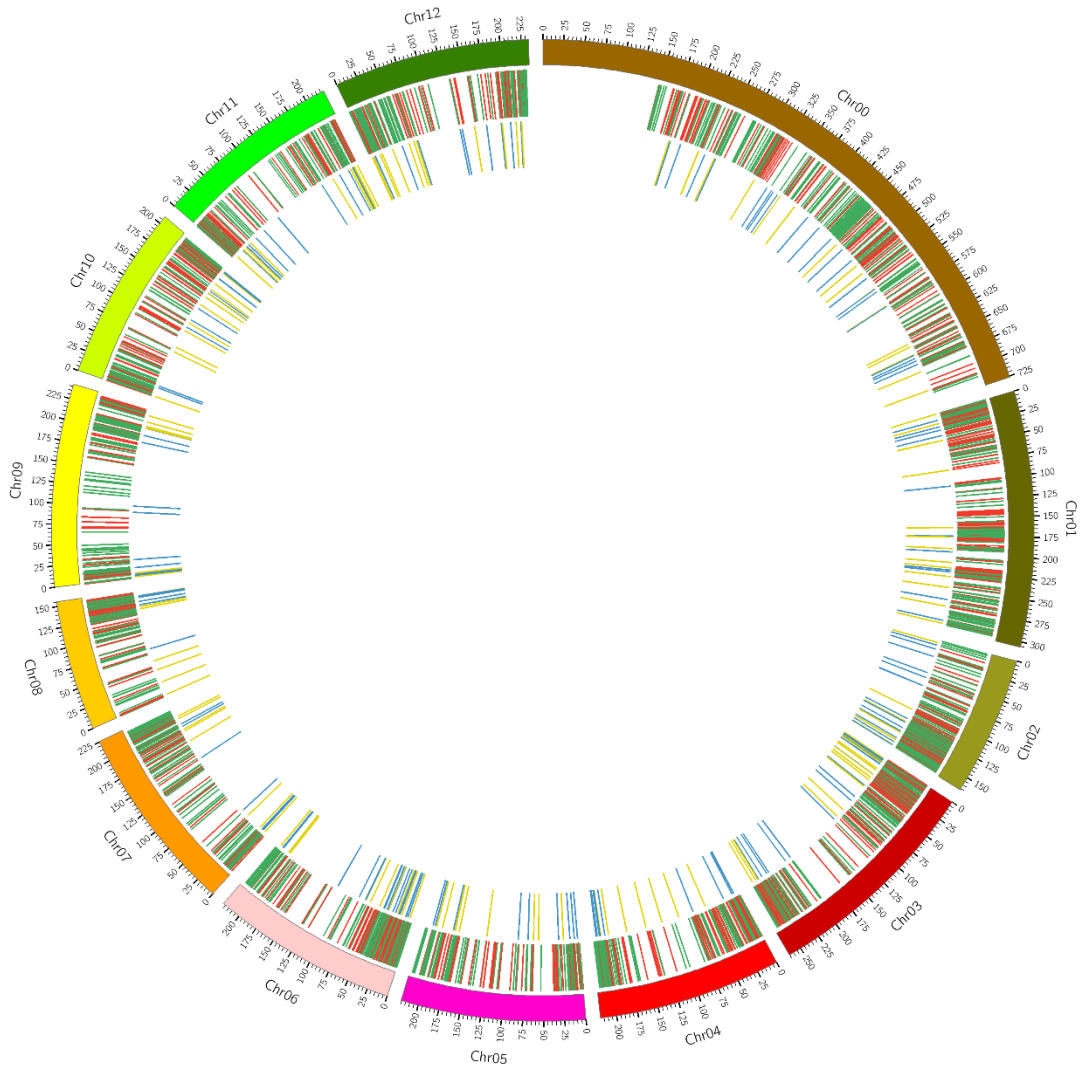

#### The Comparison of Isoform of lncRNAs and mRNAs

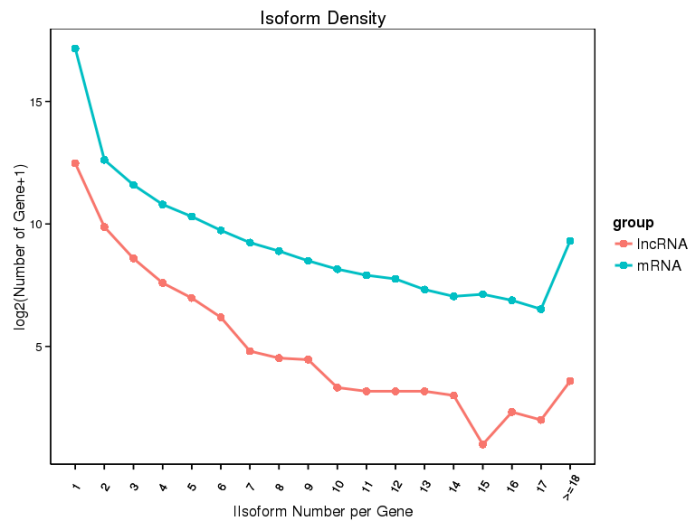

## The interactive analysis of the lncRNAs and mRNAs

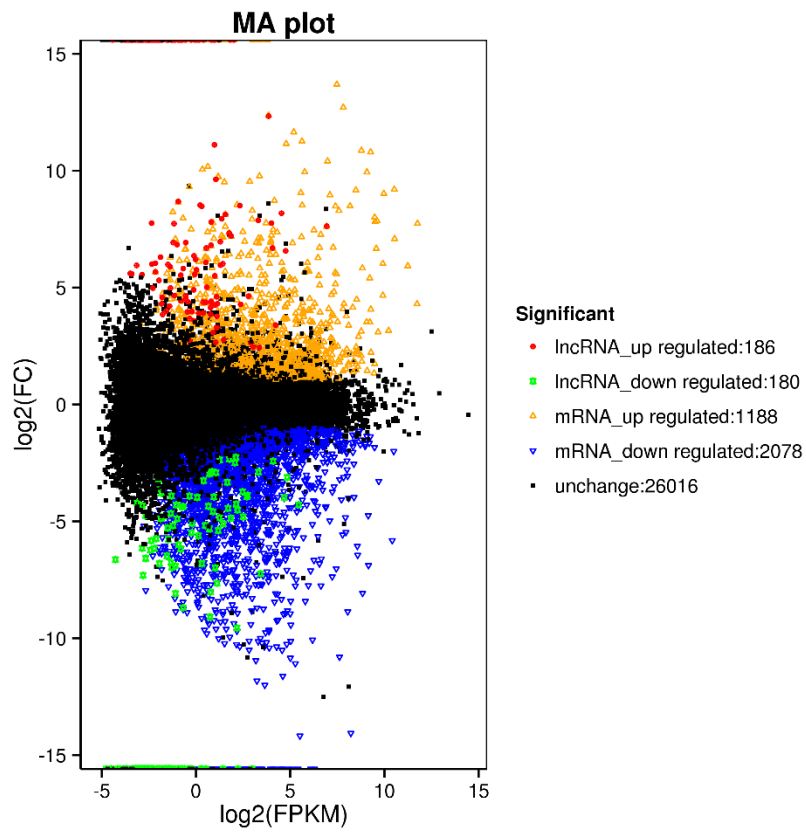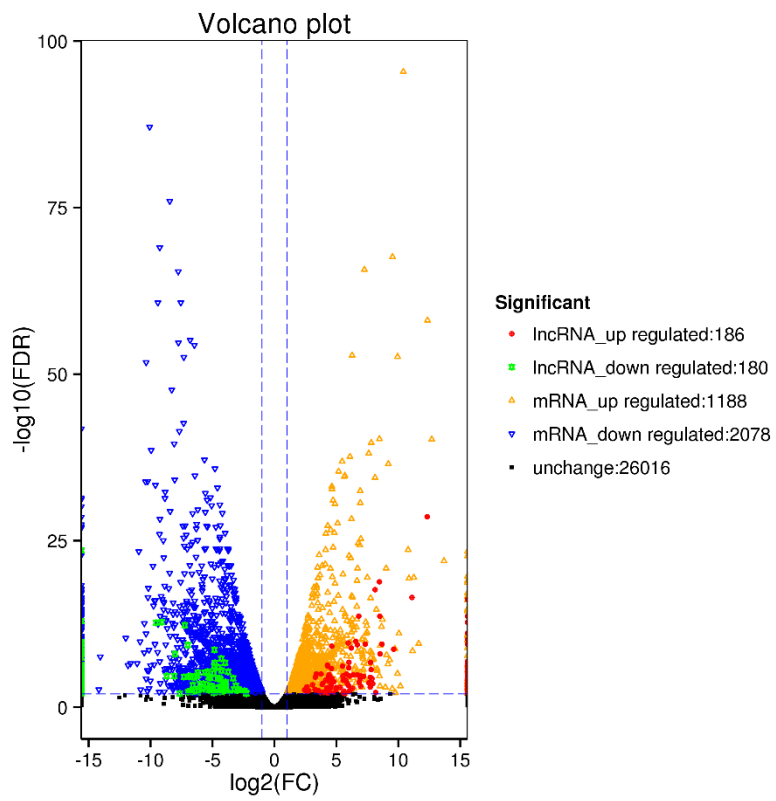

# Appendix.7 The ncRNAs and mRNAs network related figures

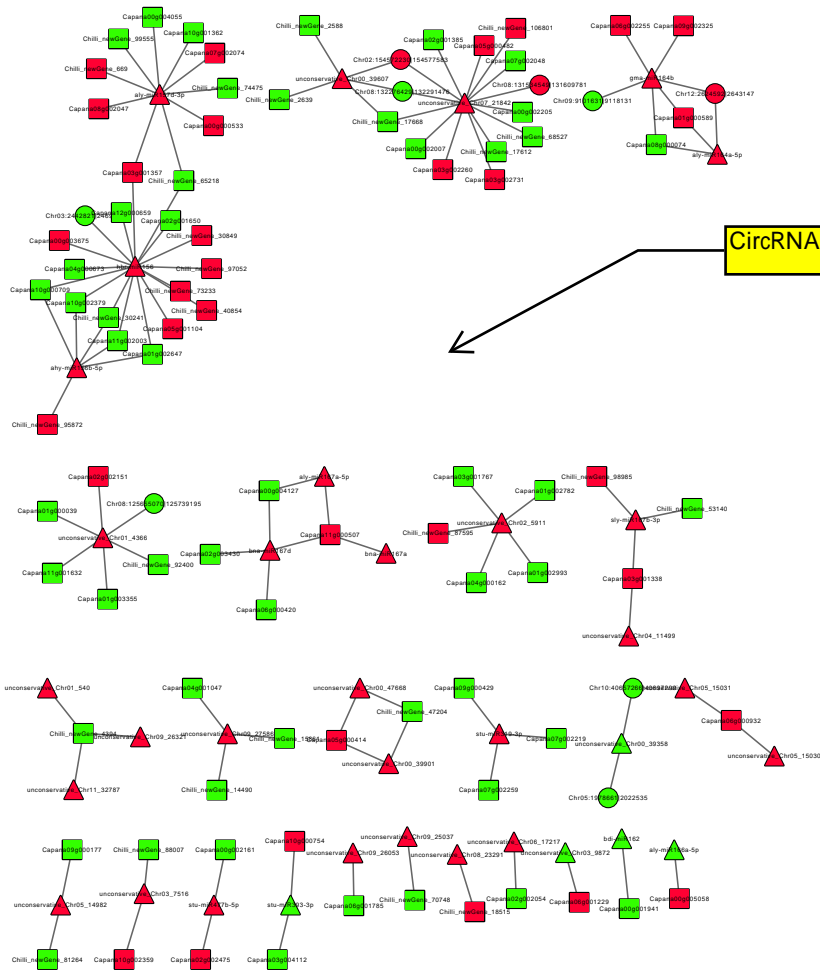

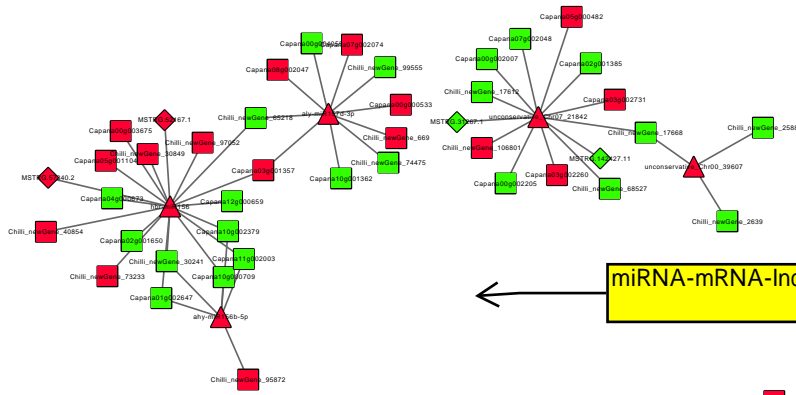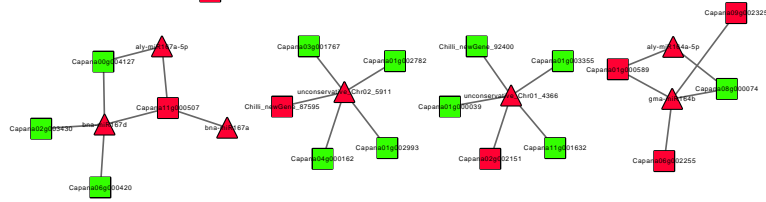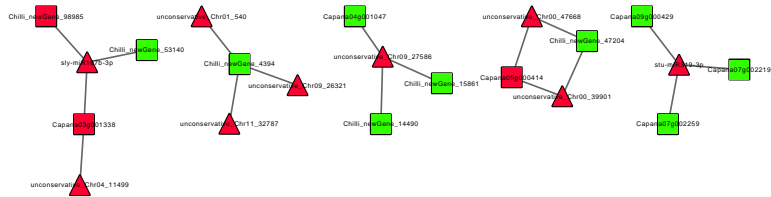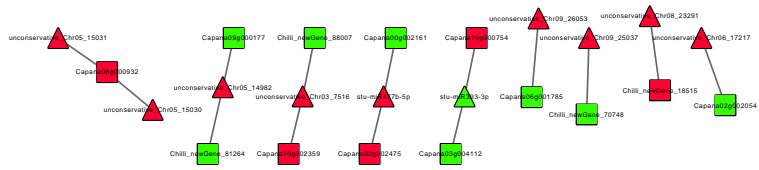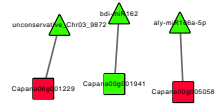

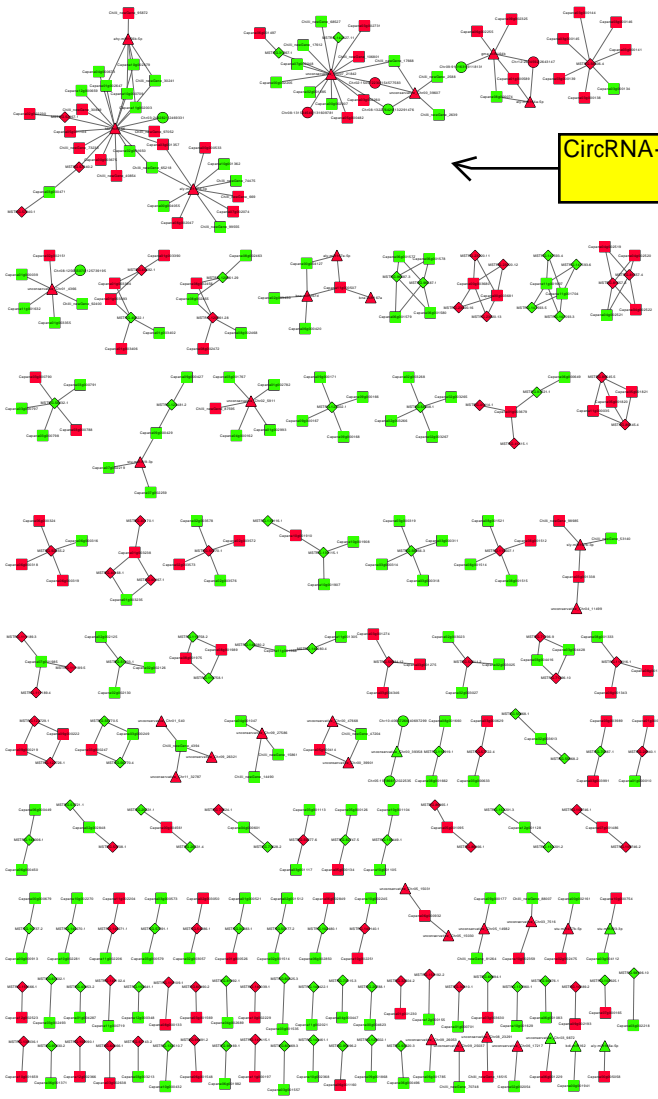

CircRNA-miRNA-mRNA-lncRNA-network

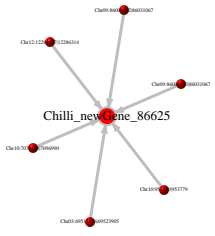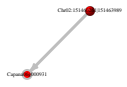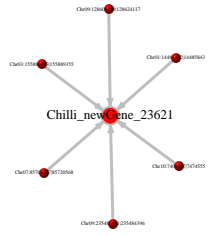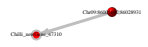

ceRNA network

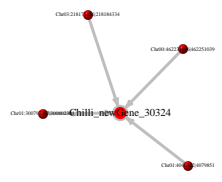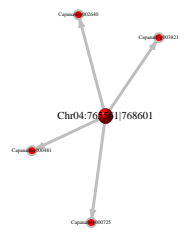

Supplement: 41598_2019_45427_MOESM3_ESM.pdf [file 41598_2019_45427_MOESM3_ESM.pdf]
